# 1                    **Innovation does not indicate behavioral flexibility in great-tailed grackles**

2                                            Corina J. Logan\*

3    SAGE Center for the Study of the Mind, University of California Santa Barbara, Santa Barbara, CA

4    93103 USA

5    \*Current address: Department of Zoology, University of Cambridge, Cambridge CB2 3EJ United

6    Kingdom, e-mail: [cl417@cam.ac.uk](mailto:cl417@cam.ac.uk)

7    *Note: this manuscript was submitted to Animal Cognition.*

## 8                    **ABSTRACT**

10    Many cross-species studies attest that innovation frequency (novel food types eaten and foraging  
11    techniques used) is a measure of behavioral flexibility and show that it positively correlates with  
12    relative brain size (corrected for body size). However, mixed results from the three studies that  
13    directly test the relationship between innovation frequency and behavioral flexibility and behavioral  
14    flexibility and brain size question both assumptions. I investigated behavioral flexibility in non-  
15    innovative great-tailed grackles that have an average sized brain, and compared their test  
16    performance with innovative, large-brained New Caledonian crows. Contrary to the prediction,  
17    grackles perform similarly to crows in experiments using clear tubes partially filled with water and  
18    containing a floating food reward, where objects must be dropped into the tube to raise the water  
19    level, bringing the food within reach. Similarly to crows, grackles preferred to drop the more  
20    functional heavy (rather than light) objects and some changed their preference in a follow up  
21    experiment where the heavy objects were no longer functional, thus exhibiting behavioral  
22    flexibility. These results challenge the assumption that innovation frequency indicates behavioral  
23    flexibility since a non-innovative bird demonstrated behavioral flexibility at a level similar to that in  
24    innovative crows, and they challenge the assumption that only large brains are capable of  
25    behavioral flexibility because a bird with an average brain size solved problems similarly to large-  
26    brained crows.

27

28 **KEYWORDS**

29 Innovation, behavioral flexibility, brain size, birds, water displacement, Aesop's Fable, comparative  
30 cognition

31

32 **INTRODUCTION**

33 Behavioral flexibility, currently defined as the ability to adapt behavior to changing contexts, is  
34 considered the keystone of complex cognition (Buckner 2013). Measuring behavioral flexibility  
35 directly in each species is time intensive. Thus, comparative biologists seek behaviors that can serve  
36 as indicators of behavioral flexibility, therefore allowing cross-species comparisons of cognition  
37 with behavior, ecology, and life history (Lefebvre et al. 1997; see Healy and Rowe 2007 for a  
38 review). One widely used indicator of behavioral flexibility is the frequency of innovations, where  
39 innovations are based on reports of novel food types eaten and foraging techniques used (Lefebvre  
40 et al. 1997, 2004, 2013; Timmermans et al. 2000; Nicolakakis and Lefebvre 2000; Reader and  
41 Laland 2002). This operational definition of behavioral flexibility relies on two main assumptions:  
42 1) innovativeness indicates complex cognition through behavioral flexibility and 2) innovativeness  
43 actually measures behavioral flexibility (e.g., Lefebvre et al. 1997, 2002; Timmermans et al. 2000).  
44 The first assumption presumes that behavioral flexibility can serve as evidence of complex  
45 cognition because those individuals with more cognitive processing power (as indicated by relative  
46 brain size [corrected for body size]) should be able to adapt their behavior more flexibly to  
47 changing circumstances. However, this is a circular argument that needs validation from external  
48 factors. Without this validation, progress can only be made on the second assumption. Here, I  
49 review the evidence provided by direct tests of behavioral flexibility in species that vary in their  
50 innovation frequencies and relative brain sizes, and I test the assumption that innovation frequency  
51 is a proxy for behavioral flexibility by comparing two bird species that differ in both respects.

52           Results from experiments testing behavioral flexibility show mixed evidence from cross-  
53 species studies about how behavioral flexibility relates to innovation frequency and relative brain  
54 size. There is some evidence that behavioral flexibility correlates with innovation frequency, but not  
55 relative brain size: Innovative, smaller-brained Galapagos finches reversed a previously learned  
56 color preference faster than less innovative, relatively larger-brained New World jays (Tebbich et  
57 al. 2010). Other evidence shows that behavioral flexibility correlates with relative brain size, but not  
58 innovation frequency: Keas and New Caledonian crows performed similarly on a multi-access box  
59 — where the successful solution of an option resulted in its closure, thereby forcing the individual  
60 to innovate another solution on the same box — even though the crows are innovative and the keas  
61 are not (Auersperg et al. 2011). Evidence from primates shows that behaviorally flexible problem  
62 solving does not correlate with innovation frequency or relative brain size: Chimpanzees, bonobos,  
63 and gorillas performed better on a multi-access box than orang-utans, and all species (except for all  
64 but one orang-utan) quickly moved on to other techniques for accessing the food when the current  
65 method stopped working (Manrique et al. 2013). All of these primate species are innovative and  
66 have relatively large brains, with gorillas having the smallest of this group of species (Isler et al.  
67 2008). The multi-access box experiment measures behavioral flexibility in successful individuals by  
68 requiring them to adapt their behavior to changing circumstances. Therefore, so far, direct evidence  
69 indicates that innovation frequency may not measure behavioral flexibility and that behavioral  
70 flexibility does not correlate with relative brain size. The one study that found evidence supporting  
71 the link between innovation frequency and behavioral flexibility comes from the only study to  
72 compare species with different brain sizes (Tebbich et al. 2010). The other two studies examined  
73 relatively large brained species and found a consistent lack of support regarding the link between  
74 innovation frequency and behavioral flexibility. Therefore, it is unclear how innovation frequency  
75 relates to brain size when examining behavioral flexibility directly.

76           The aim of my study was to test the relationship between innovation frequency and  
77 behavioral flexibility, and behavioral flexibility and relative brain size in species with differing

78 brain sizes by directly measuring behavioral flexibility in great-tailed grackles (*Quiscalus*  
79 *mexicanus*) and comparing their performance with previously tested New Caledonian crows  
80 (*Corvus moneduloides*; Logan et al. 2014). Grackles are not innovative (n=1 innovation; Ducatez et  
81 al. 2014) and have an average relative brain size, while New Caledonian crows are innovative (n=8  
82 innovations; literature reviewed by Logan: Layard & Layard 1882, Le Goupils 1928, Hunt 1996,  
83 2008, Hunt & Gray 2004) and have relatively large brains (relative brain size data for 2131 bird  
84 species from: Alma and Bee de Speroni 1992; Bee de Speroni and Carezzano 1995; Boire and  
85 Baron 1994; Carezzano et al. 1995; Crile and Quiring 1940; Day et al. 2005; Ebinger 1995; Ebinger  
86 and Lohmer 1984, 1987; Ebinger and Rohrs 1995; Fernandez et al. 1997; Frahm and Rehkamper  
87 1998, 2004; Iwaniuk and Nelson 2003; Iwaniuk 2004; Iwaniuk et al. 2004, 2005; Iwaniuk and  
88 Wylie 2006; Iwaniuk unpublished data [380 species]; Milkovsky 1989a,b,c, 1990; Møller et al.  
89 2004; Pistone et al. 2002; Rehkamper et al. 1991, 2003, 2008). Therefore, the prediction is that the  
90 less innovative and smaller-brained grackles will show less behavioral flexibility than crows.

91 I tested behavioral flexibility in grackles using the water tube paradigm (or Aesop's Fable  
92 paradigm), which has previously been used to explore the cognitive abilities that underlie problem  
93 solving (Bird & Emery 2009; Cheke et al. 2011, 2012; Taylor et al. 2011; Jelbert et al. 2014; Logan  
94 et al. 2014). This research has shown that corvids (birds in the crow family) prefer to drop heavy  
95 objects that sink, rather than light objects that float, into a water tube to raise the water level and  
96 bring floating food within reach (Cheke et al. 2011; Taylor et al. 2011; Jelbert et al. 2014; Logan et  
97 al. 2014). In these experiments, the heavy objects displaced more water than the light objects, thus  
98 raising the water level in the tube by a larger amount and bringing the food closer to the top of the  
99 tube. Previous heavy vs. light experiments (also called sinking vs. floating) used objects where the  
100 heavy items (rubber) were sinkable, but the light items (foam or polystyrene) were not, thus one  
101 needed to discriminate between discrete kinds of functionality to solve the task.

102 In this study, I modified the water tube experiments to investigate behavioral flexibility. I  
103 tested behavioral flexibility, the ability to change preferences when the context changes (Buckner

104 2013), by presenting the grackles first with the heavy vs. light experiment and then with a follow up  
105 experiment in which the heavy objects were no longer functional. In this follow up experiment  
106 (heavy vs. light magic), heavy objects stuck to a magnet placed inside the tube above the water  
107 level, leaving the light objects as the functional option because they could fall past the magnet and  
108 into the water. If grackles preferred heavy objects or had no preference in the heavy vs. light  
109 experiment and then changed their preference in the heavy vs. light magic experiment to preferring  
110 neither object or light objects, this would indicate that their preferences are sensitive to changing  
111 contexts. New Caledonian crows exhibited behavioral flexibility using the water tube tests when  
112 they discriminated between two tubes of different volumes (Logan et al. 2014). In the first  
113 experiment, crows preferred to drop objects into a narrow (functional) rather than a wide (non-  
114 functional) tube when water levels were equal in both tubes. In a follow up experiment where the  
115 narrow tube was no longer functional because the water level was too low, crows changed their  
116 preference to dropping objects into the functional wide tube. I carried out these same experiments  
117 with the grackles to compare their flexibility with that in New Caledonian crows.

118 To summarize, behavioral flexibility would be shown if the grackles that preferred heavy in  
119 heavy vs. light changed their preference to no preference or to preferring light objects in heavy vs.  
120 light magic experiment, and if those grackles that preferred the narrow tube in narrow vs. wide with  
121 equal water levels experiment changed their preference to the wide tube in narrow vs. wide with  
122 unequal water levels experiment. The crows were not given the heavy vs. light magic experiment  
123 because it had not been designed yet, therefore grackle and crow behavioral flexibility could be  
124 directly compared using the wide vs. narrow equal and unequal water level experiments. Behavioral  
125 flexibility in these two species could be more generally compared in terms of their ability to change  
126 preferences when circumstances change regardless of which experiments they demonstrate  
127 flexibility in.

128

129 **METHODS**

130 **Ethics**

131 This research was carried out in accordance with permits from the U.S. Fish and Wildlife Service  
132 (scientific collecting permit number MB76700A), California Department of Fish and Wildlife  
133 (scientific collecting permit number SC-12306), U.S. Geological Survey Bird Banding Laboratory  
134 (federal bird banding permit number 23872), and the Institutional Animal Care and Use Committee  
135 at the University of California Santa Barbara (IACUC protocol number 860).

136

137 **Subjects and Study Site**

138 Eight wild adult great-tailed grackles (4 females and 4 males) were caught using a walk-in baited  
139 trap measuring 2ft high by 2ft wide by 4ft long (design from Overington et al. 2011). Birds were  
140 caught (and tested) in two batches: batch one at the Andree Clark Bird Refuge (4 birds in  
141 September 2014, released in December) and batch two at East Beach Park (4 birds in January 2015,  
142 released in March) in Santa Barbara, California. They were housed individually in aviaries  
143 measuring 72in high by 47in wide by 93in long at the University of California Santa Barbara for 2-  
144 3 months while participating in the experiments in this study. Grackles were given water *ad libitum*  
145 and unrestricted amounts of food (Mazuri Small Bird Food, bread, and peanuts) for at least 20 hrs  
146 per day, with their main diet being removed for up to 4 hrs on testing days while they participated in  
147 experiments. Grackles were aged by plumage and eye color and sexed by plumage and weight  
148 following Pyle (2001). Biometrics, blood, and feathers were collected at the beginning and end of  
149 their time in the aviary. Their weights were measured at least once per month, first at the time of  
150 trapping using a balancing scale, and subsequently by placing a kitchen scale covered with food in  
151 their aviary and recording their weight when they jumped onto the scale to eat.

152

153 **Color Learning to Prevent Side Bias**

154 To help break potential side biases during the wide vs. narrow water tube experiment, I first had  
155 grackles learn a simple association between food and color, which forced them to pay attention to

156 color rather than spatial location (see Logan et al. 2014). They were given a silver and a gold tube  
157 with food always hidden in the gold tube. One silver and one gold tube were placed at opposite ends  
158 of a table with the tube openings facing the side walls so the bird could not see which tube  
159 contained the food. Tubes were pseudorandomized for side and the left tube was always placed on  
160 the table first, followed by the right to avoid behavioral cueing. Pseudorandomization involved  
161 alternating sides for the first two trials in a 10-trial set and then never having one tube on the same  
162 side for more than two trials in a row, while avoiding a pattern that would allow the bird to follow a  
163 rule to solve the task rather than learning which color indicated the food. Each trial consisted of  
164 placing the tubes on the table and then the bird had the opportunity to choose one tube by looking  
165 into it (and eating from it if it chose the gold tube). Once the bird chose, the trial ended by  
166 interrupting the bird and removing the tubes. A bird passed this test if it made at least 17 correct  
167 choices out of the most recent 20 trials. Proficiency with this test then served as a useful tool for  
168 later water tube experiments involving two tubes: if a grackle developed a side bias, the water tube  
169 experiment was paused and silver/gold tests were conducted until the bird attended to color rather  
170 than location (side).

171

## 172 **Spontaneous Stone Dropping**

173 Birds were given two sequential 5 minute trials with the stone dropping training apparatus and two  
174 stones to see whether they would spontaneously drop stones down tubes. The stone dropping  
175 training apparatus was a clear acrylic box with a tube on top. The box contained out of reach food  
176 on top of a platform that was obtainable by dropping a stone into the top of the tube, which, when  
177 contacting the platform, forced the magnet holding it up to release the platform (design as in Bird  
178 and Emery 2009 with the following tube dimensions: 90mm tall, outer diameter=50mm, inner  
179 diameter=37 or 44mm; Figure 1). The food then fell from the platform to the table. At the end of the  
180 first 5 minute trial, the stones were moved to different locations on the table and on the wooden  
181 blocks. The blocks made it easier to access the top of the tube.



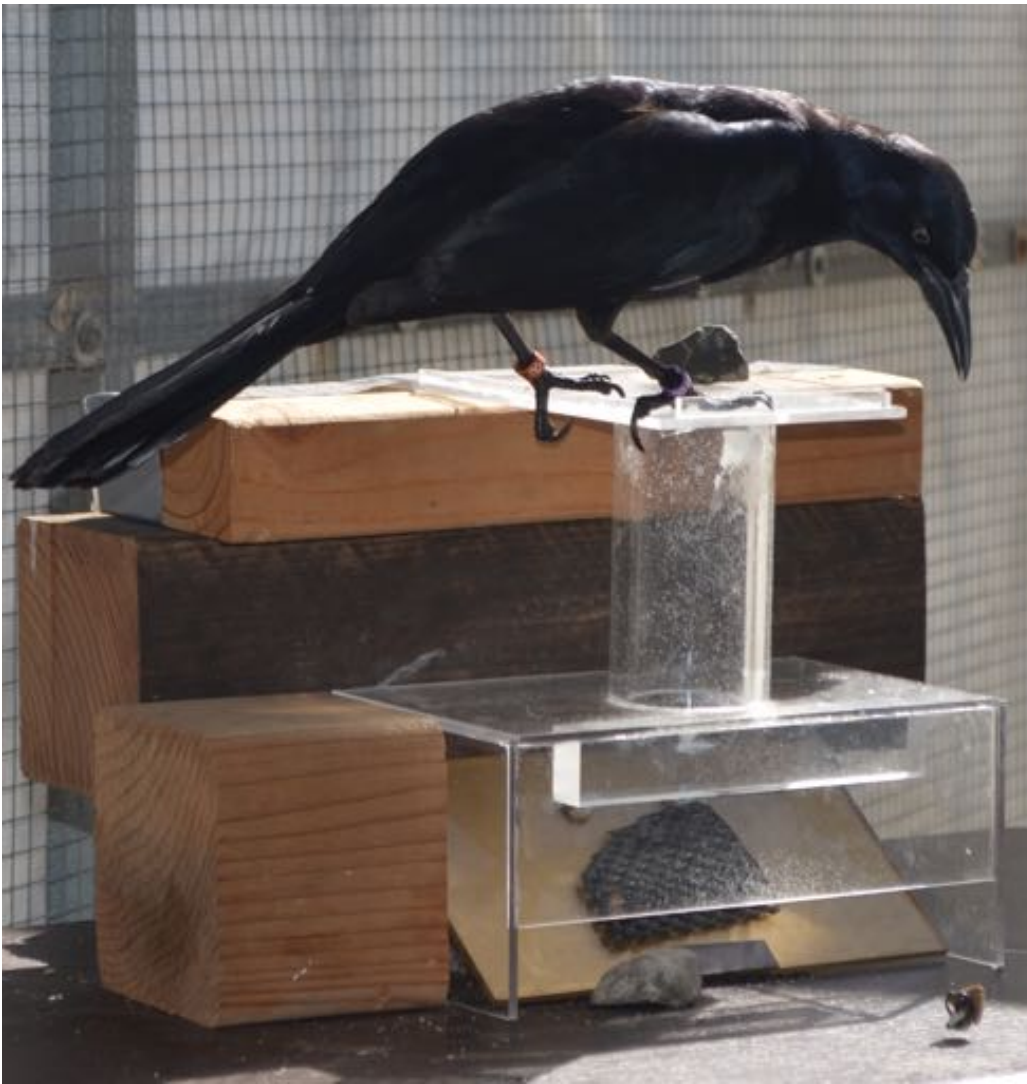

182

183 Figure 1. Batido participates in stone dropping training.

184

### 185 **Stone Dropping Training**

186 Those birds that did not spontaneously drop stones down the tube on the stone dropping training  
187 apparatus were trained to push or drop stones down tubes using this apparatus. Birds were given  
188 two stones and went from accidentally dropping stones down the tube as they pulled at food under  
189 the stones, which were balanced on the edge of the tube opening, to pushing or dropping stones into  
190 the tube from anywhere near the apparatus. Once the bird proficiently pushed or dropped stones into  
191 the apparatus 30 times, they moved onto the reachable distance on a water tube. Stone  
192 pushing/dropping proficiency was defined as consistently directing the stone to tube opening from  
193 anywhere on the ramp on the top of the apparatus. Not all motions had to be in the direction of the



194 tube opening because some grackles preferred to move the stone to a particular location on the ramp  
195 (which may initially be in the opposite direction from the tube) and push or drop it in from there or  
196 push the stone in shorter, angular strokes. It was permissible for a bird to throw one of the stones off  
197 the side of the apparatus (which occurred sporadically throughout all of their experiences with stone  
198 pushing/dropping) as long as they proficiently put the other stone in the tube.

199

## 200 **Reachable Distance**

201 To determine how high to set the water levels in water displacement experiments, a bird's reachable  
202 distance was obtained. Food was placed on cotton inside a resealable plastic bag, which was stuffed  
203 inside the standard water tube (a clear acrylic tube [170mm tall, outer diameter=51mm, inner  
204 diameter=38mm] super glued to a clear acrylic base [300x300x3mm]) to obtain the reachable  
205 distance without giving the bird experience with water (Figure 2). The food was first placed within  
206 reach and then lowered into the tube in 1cm increments until the bird could not reach it. The lowest  
207 height the bird could still reach was considered its reachable distance and water levels in subsequent  
208 experiments were set to allow the desired number of objects to bring the food within reach.

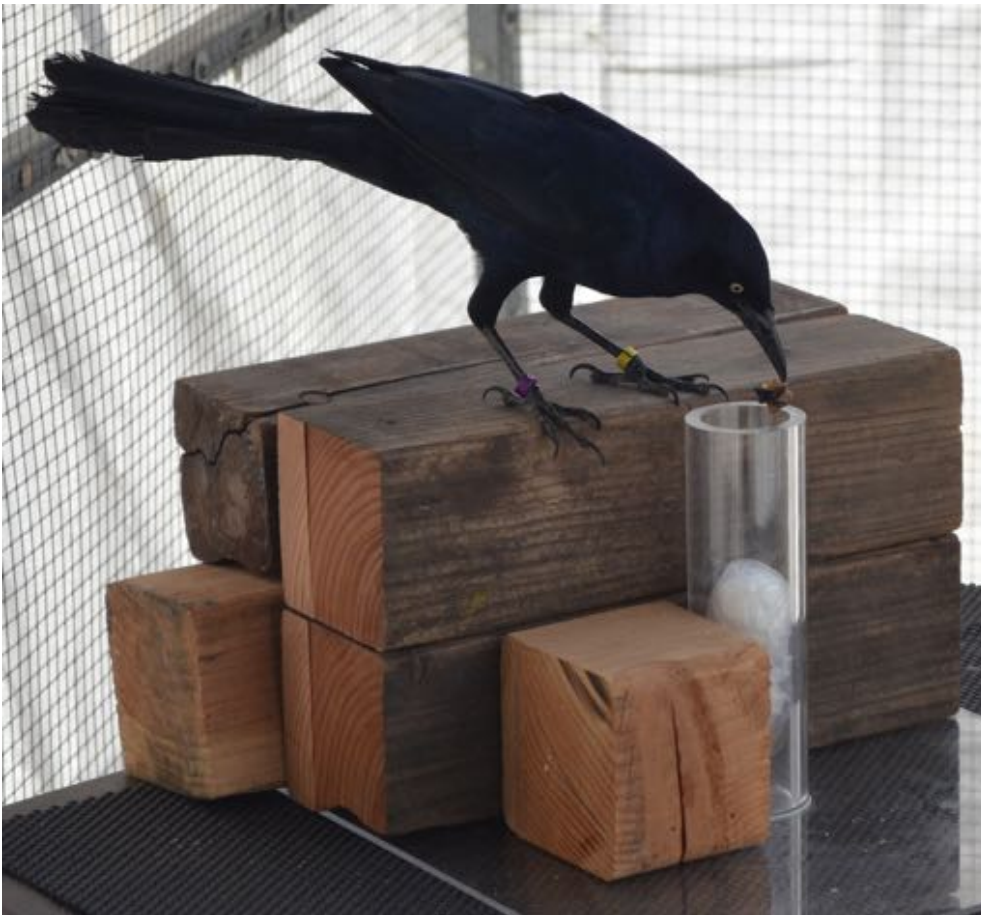

209

210 Figure 2. Obtaining Tequila's reachable distance by placing food on top of cotton wrapped in plastic  
211 to avoid giving him experience with water before the experiments.

212

### 213 **Water Tube Proficiency Assessment**

214 To determine whether individuals transfer their stone pushing/dropping skills from a tube on a  
215 platform to a tube containing water or whether they need additional training on this new apparatus,  
216 they were given a partially filled water tube with a floating peanut piece and four stones (9-14g,  
217 each displaces 5-6mm water) which they could drop into the tube to raise the water level and  
218 consequently reach the food (Figure 3). Once a bird accomplished 30 consecutive proficient trials,  
219 they moved onto experiment 1. Proficiency was defined as in the stone dropping training section  
220 above.

221

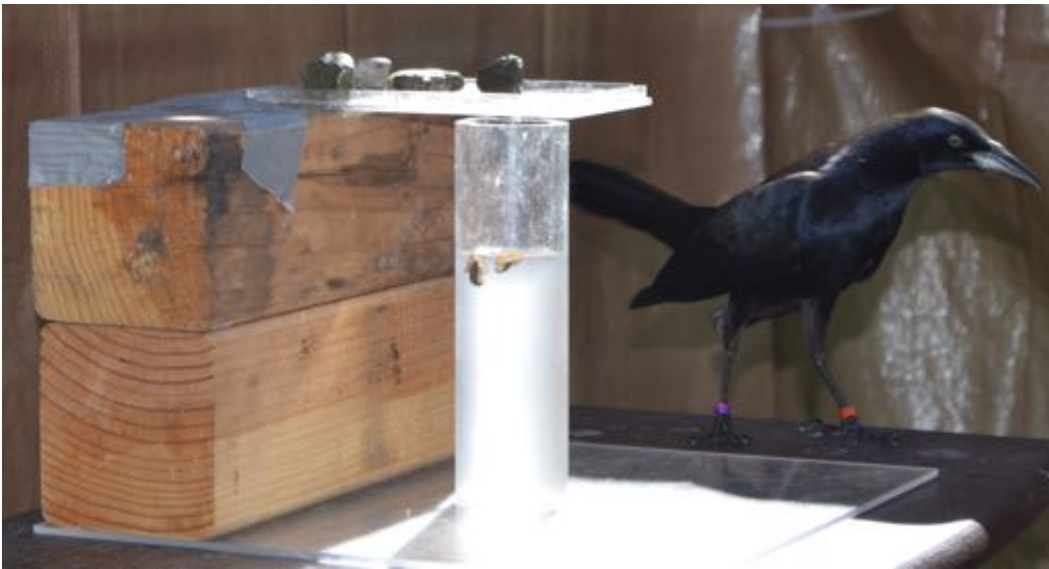

222

223 Figure 3. Batido participates in the water tube proficiency assessment.

224

### 225 **Experimental Set Up**

226 Apparatuses were placed on top of rolling tables (23.5in wide by 15.5in long) and rolled into each  
227 individual's aviary for testing sessions, which lasted up to approximately 20min. Tubes were baited  
228 with 1/16 of a peanut attached to a small piece of cork with a tie wrap for buoyancy (peanut float).  
229 The area around the top of the tube next to the objects available for dropping in the tube was also  
230 sometimes baited with smaller peanut pieces and bread crumbs to encourage the bird to interact  
231 with the task. All experiments consisted of 20 trials per bird.

232

### 233 **Experiment 1: Heavy vs. Light**

234 A water tube was presented with 4 heavy (steel rod wrapped in fimo clay, weight=10g, each  
235 displaces 2-3mm of water) and 4 light (plastic tube partially filled with fimo clay, weight=2g, each  
236 displaces 1-1.5mm of water) objects placed in pseudorandomized (as explained for color learning)  
237 pairs near the top of the tube (both objects were 21-24mm long and 8mm in diameter; Figure 4).  
238 Heavy objects displaced 0.5-2mm more water than light objects, thus making them more functional  
239 than the light objects, but importantly, both objects were functional.

240

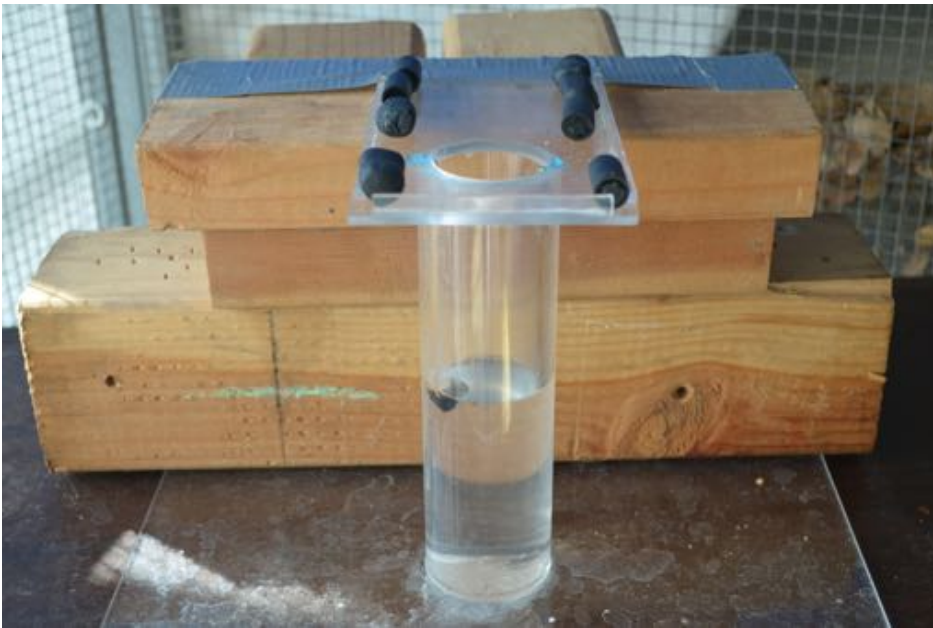

241

242 Figure 4. The Heavy vs. Light experimental set up.

243

#### 244 **Experiment 2: Heavy vs. Light Magic**

245 The set up was the same as in experiment 1, except there were magnets (2 super magnets on the  
246 outside and 3 inside of the tube) attached to the tube above the water level such that the heavy  
247 objects would stick to the magnets and not displace water, while the light objects could fall past the  
248 magnets into the water, thus being the functional choice (Figure 5). Birds were given 3 heavy and 3  
249 light objects, placed in pseudorandomized pairs near the top of the tube.

250

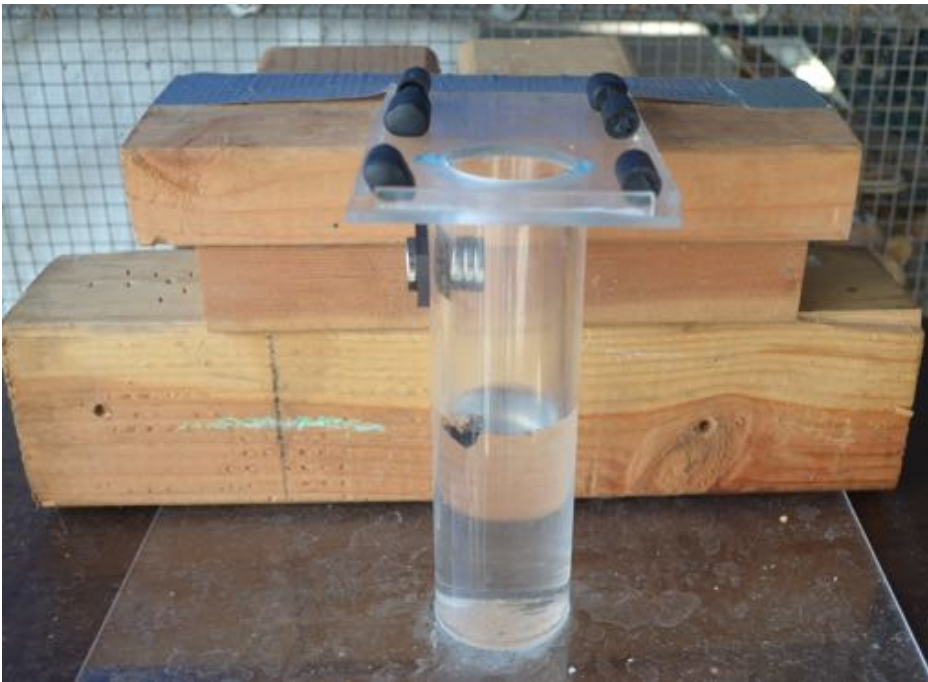

251

252 Figure 5. The Heavy vs. Light Magic experimental set up, which includes magnets stuck to the tube  
253 above the water level.

254

### 255 **Experiment 3: Narrow vs. Wide Equal Water Levels**

256 To determine whether birds understand volume differences, a wide and narrow tube with equal  
257 water levels were presented with four objects made out of fimo clay (30x10x5mm, 3-4g, each  
258 object displaced 1-2mm in wide tube and 5-6mm in narrow; Logan et al. 2014; Figure 6). Two  
259 objects were placed near the narrow tube opening and two objects near the wide tube opening. The  
260 objects were only functional if dropped into the narrow tube because the water levels were set such  
261 that dropping all of the objects into the wide tube would not bring the floating food within reach.  
262 However, dropping 1-2 objects into the narrow tube would raise the water level enough to reach the  
263 food. Both tubes were 170mm tall with 3mm thick lids that constricted the opening to 25mm in  
264 diameter to equalize the bird's access to the inside of each tube, and super glued to a clear acrylic  
265 base (300x300x3mm). The wide tube (outer diameter=57mm, inner diameter=48mm,  
266 volume=307,625mm<sup>3</sup>) was roughly equally larger than the standard water tube (dimensions above,  
267 volume=192,800mm<sup>3</sup>) as the narrow tube was smaller (outer diameter=38mm, inner



268 diameter=25mm, volume=83,449mm<sup>3</sup>). The position of the tubes was pseudorandomized for side to  
269 ensure that tube choices were not based on a side bias.

270

#### 271 **Experiment 4: Narrow vs. Wide Unequal Water Levels**

272 Those grackles that passed experiment 3 continued to this experiment to determine whether their  
273 tube choices adjusted to changing circumstances. This experiment was the same as experiment 3,  
274 except the water level in the narrow tube was lowered to 5cm from the table, thus making the food  
275 unreachable even if all objects were dropped into this tube (as in Logan et al. 2014). The water level  
276 in the wide tube was raised such that the bird could reach the food in 1-4 object drops.

277

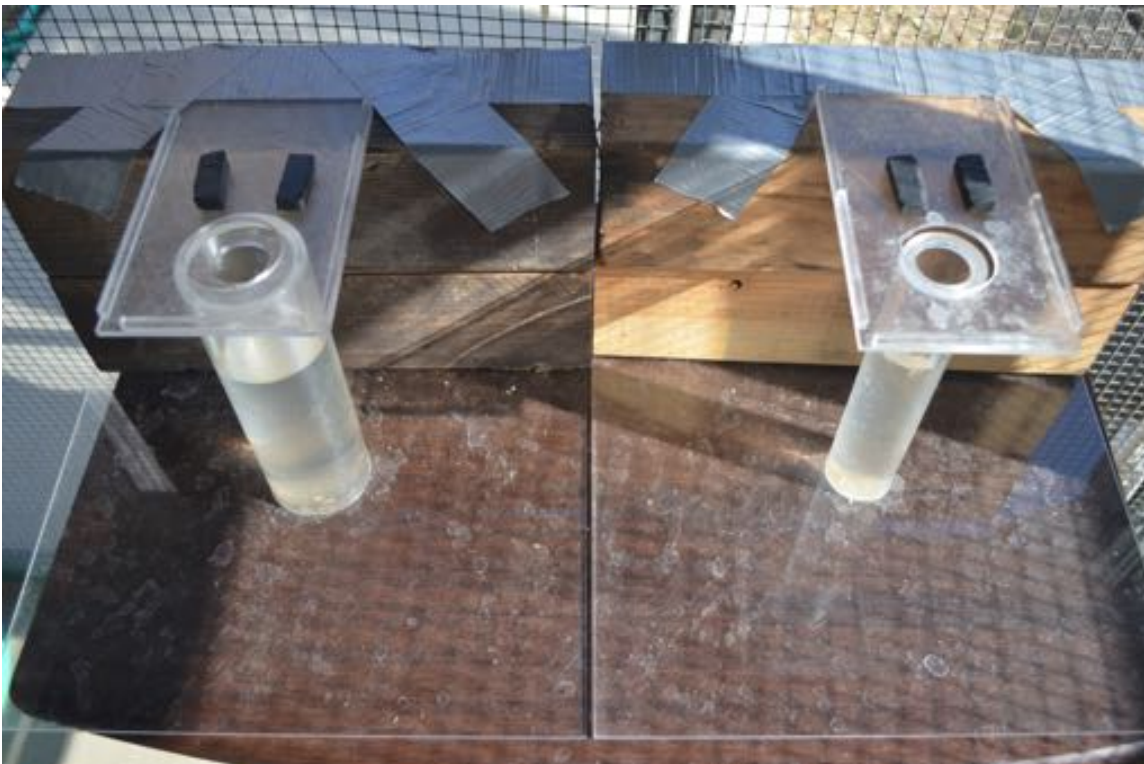

278

279 Figure 6. The Narrow vs. Wide with equal water levels experimental set up.

280

#### 281 **Experimenters**

282 I conducted all experiments, and my students (Luisa Bergeron, Alexis Breen, Michelle Gertsvolf,  
283 Christin Palmstrom, and Linnea Palmstrom) and I conducted the stone dropping training.

284

## 285 **Statistical Analyses**

286 To make this research comparable with previous studies, I used binomial tests to determine whether  
287 each grackle chose particular objects or tubes at random chance (null hypothesis:  $p \geq 0.05$ ) or  
288 significantly above chance (alternative hypothesis:  $p < 0.05$ ). The Bonferroni-Holm correction was  
289 applied to p-values within each experiment to correct for an increase in false positive results that  
290 could arise from conducting multiple tests on the same dataset.

291 Generalized linear mixed models (GLMMs) were used to determine whether birds preferred  
292 particular objects or tubes (response variable: correct or incorrect choice) in an experiment and  
293 whether the trial number or bird influenced choices (explanatory variables: experiment, trial  
294 number, bird), and to control for the non-independence of multiple choices per trial (random factor:  
295 choice number). I set the prior to fix the variance component to one (fix=1) because the  
296 measurement error variance was known, as is standard when choices are binary (Hadfield 2010). I  
297 ensured that the Markov chain for this test model converged by manipulating the number of  
298 iterations (nitt=150000), the number of iterations that must occur before samples are stored  
299 (burnin=30000), and the intervals the Markov chain stores (thin=300) until successive samples were  
300 independent (autocorr function, MCMCglmm package: Hadfield 2010) and there were no trends  
301 when visually inspecting the time series of the Markov chain (function: plot(testmodel\$Sol);  
302 Hadfield 2014). I compared this test model to a null model where I removed all explanatory factors  
303 and set it to 1. I determined whether the test model was likely given the data, relative to the null  
304 model by using Akaike weights (range: 0-1, all model weights sum to 1; Akaike 1981; Weights  
305 function, MuMIn package: Bates et al. 2011). The Akaike weight indicates the “relative likelihood  
306 of the model given the data” (Burnham and Anderson 2002, p. xxiii) and models with Akaike  
307 weights greater than 0.9 are considered reliable models because they are highly likely given the data  
308 (Burnham and Anderson 2002). The test model was highly likely given the data (Akaike  
309 weight=0.99) and the null model was not (Akaike weight=0.0009). To investigate potential effects  
310 of season or order of testing, I carried out a GLMM to investigate whether the batch to which the



311 bird belonged (explanatory variable: batch=1 or 2) influenced their test performance (response  
312 variable: correct or incorrect choice) while controlling for the non-independence of multiple choices  
313 per trial (random factor: choice number). The null model was highly likely given the data (Akaike  
314 weight=0.94), while the batch model was not (Akaike weight=0.06), indicating that batch did not  
315 influence test performance. GLMMs were carried out in R v3.1.2 (R Core Team 2014) using the  
316 MCMCglmm function (MCMCglmm package) with a binomial distribution (called categorical in  
317 MCMCglmm) and logit link.

318

### 319 **Data Availability**

320 The data used for the GLMM, including each choice for every bird in all experiments, is available  
321 at the KNB Data Repository: [https://knb.ecoinformatics.org/#view/corina\\_logan.15.4](https://knb.ecoinformatics.org/#view/corina_logan.15.4) (Logan 2015).

322

## 323 **RESULTS**

### 324 **Spontaneous Stone Dropping**

325 No grackle spontaneously dropped stones down the tube of the platform apparatus. Therefore, they  
326 all underwent stone dropping training.

327

### 328 **Stone Dropping Training**

329 Most grackles learned to push stones into a tube on the platform apparatus in 165-392 trials (Table  
330 1), however Michelada was scared of the stone falling down the tube and did not habituate to this  
331 event and Jugo learned too slowly to become proficient by the time he needed to be released,  
332 therefore they were excluded from the stone dropping experiments. The training procedure was  
333 modified from Logan et al. (2014) to allow stone pushing from a clear cast acrylic ramp placed on  
334 top of the tube rather than stone dropping by picking up the stone from the table and putting it into  
335 the tube (without a ramp; see Figures 1-6). The modification was necessary because grackles seem  
336 to form associations between the stones and the top of the tube, the stones and the table where the

337 food comes out, and the stones falling only in one direction: down. When I placed the stones below  
338 the level of the top of the tube to try to train them to pick the stones up and put them in the top of  
339 the tube, the grackles took the stones and dropped them off the side of the apparatus or table, often  
340 placing them on the table and then looking at where the platform should have fallen open, awaiting  
341 the food. Placing the ramp on the water tubes for the experiments was implemented to mitigate this  
342 limitation. Once this change was made, it was no longer necessary to train the grackles to pick up  
343 and drop the stones because pushing them into the tube sufficed and required less training.

344

### 345 **Water Tube Proficiency Assessment**

346 Most grackles immediately applied their stone dropping skills to a water tube context as indicated  
347 by their first 30 trials being proficient (Cerveza, Margarita, Refresco, Batido). Horchata took 31  
348 trials to reach proficiency. Tequila did initially apply his stone dropping skills to a water tube  
349 context, however his order of experiments was different: he went from determining his reachable  
350 distance to an experiment involving a water-filled and a sand-filled tube, filled to equal levels. He  
351 participated in three trials, but lost motivation and started to give up on participating in stone  
352 dropping all together. The water tube proficiency assessment was then developed to remotivate him  
353 to participate in subsequent experiments, and the sand vs. water experiment was eliminated. After  
354 this additional experience, Tequila needed 106 trials to reach the water tube proficiency criteria.

355

### 356 **Experiment 1: Heavy vs. Light**

357 Four grackles (Tequila, Margarita, Batido, and Refresco) were 3.2-4.9 times more likely to choose  
358 heavy objects rather than the less functional light objects, while two grackles (Cerveza and  
359 Horchata) had no preference (they were 0.6-1.4 times more likely to succeed than fail; see Table 1  
360 for binomial test results and Table 2 for GLMM results, Supplementary Material Video 1 available  
361 at: [https://youtu.be/Wa44bz9MU\\_8](https://youtu.be/Wa44bz9MU_8)). Cerveza and Horchata's performances improved across trials:  
362 they were 3.6-4.1 times more likely to succeed than fail as trial number increased, indicating that

363 they learned through trial and error that the heavy objects were more functional (Table 2). The other  
 364 grackles' performances did not improve with increasing trial number, indicating that they used prior  
 365 knowledge to solve the task (Table 2). Horchata was not motivated to participate in the water tube  
 366 experiments: she required bait between almost all trials to get her to continue to interact with the  
 367 apparatus, which might have influenced her lack of success. All choices in all trials for all birds in  
 368 all experiments are presented in Figures S1.1-1.3 in Supplementary Material.

369

370 Table 1. Performance per bird per experiment: the number of stone dropping training trials needed  
 371 to reach proficiency, and p-values from Bonferroni-Holm corrected (within experiment) binomial  
 372 tests for each experiment (- = was not given this experiment). Note: Tequila was the first bird tested  
 373 and I did not realize until after I trained him to pick up and drop the stones into the tube that I  
 374 wanted to only train the other birds to push the stones into the tube to save training time. Therefore,  
 375 the trial numbers for the other birds refer to proficiency to push objects into the tube, not pick up  
 376 and drop them. Y=yellow, P=purple, B=blue, O=orange, R=red, G=green.

| <b>Bird (color rings)</b> | <b>Sex</b> | <b>Stone drop training trials</b> | <b>Heavy vs. Light</b> | <b>Heavy vs. Light Magic</b> | <b>Wide vs. Narrow Equal</b> |
|---------------------------|------------|-----------------------------------|------------------------|------------------------------|------------------------------|
| <b>Tequila (YP)</b>       | M          | 222 push / 263 drop               | 0.003 heavy            | 0.60                         | -                            |
| <b>Margarita (PB)</b>     | F          | 392                               | 0.00001 heavy          | 0.02 heavy                   | -                            |
| <b>Cerveza (BO)</b>       | F          | 282                               | 0.06                   | 0.02 heavy                   | 1.00                         |
| <b>Michelada (OR)</b>     | F          | -                                 | -                      | -                            | -                            |
| <b>Batido (OP)</b>        | M          | 209                               | 0.002 heavy            | 0.02 heavy                   | 1.00                         |
| <b>Horchata (GR)</b>      | F          | 165                               | 0.60                   | 1.00                         | -                            |
| <b>Refresco (PY)</b>      | M          | 234                               | 0.009 heavy            | 1.00                         | 1.00                         |
| <b>Jugo (RB)</b>          | M          | -                                 | -                      | -                            | -                            |

377

378

379

380

381 Table 2. Examining the influence of experiment, trial, and bird on test success (Test Performance)  
 382 and whether success increased with trial number (Learning Effects), thus indicating a learning  
 383 effect. GLMM: Choices Correct ~ Experiment\*Trial\*Bird, random = ~Choice Number. CI=credible  
 384 intervals, italics indicates the intercept.

|                                     | Test Performance |              |              | Learning Effects |              |              |
|-------------------------------------|------------------|--------------|--------------|------------------|--------------|--------------|
|                                     | Posterior Mean   | Lower 95% CI | Upper 95% CI | Posterior Mean   | Lower 95% CI | Upper 95% CI |
| Choice number                       | 0.002            | 1.39E-16     | 0.002        | -                | -            | -            |
| <b><i>Heavy vs. Light</i></b>       |                  |              |              |                  |              |              |
| <i>Batido</i>                       | <i>1.27</i>      | <i>0.08</i>  | <i>2.65</i>  | -0.01            | -0.13        | 0.13         |
| Margarita                           | 0.32             | -1.95        | 2.69         | 0.05             | -0.14        | 0.27         |
| Cerveza                             | -1.78            | -3.66        | 0.19         | 0.13             | 0.05         | 0.29         |
| Horchata                            | -0.96            | -3.02        | 0.93         | 0.01             | -0.20        | 0.18         |
| Refresco                            | -0.11            | -1.99        | 2.00         | -0.01            | -0.17        | 0.16         |
| Tequila                             | 0.29             | -1.68        | 2.36         | -0.01            | -0.18        | 0.21         |
| <b><i>Heavy vs. Light Magic</i></b> |                  |              |              |                  |              |              |
| Batido                              | -1.95            | -4.25        | 0.19         | -0.07            | -0.27        | 0.18         |
| Margarita                           | -0.35            | -3.61        | 3.16         | -0.01            | -0.26        | 0.32         |
| Cerveza                             | 1.87             | -1.29        | 4.52         | -0.16            | -0.46        | 0.11         |
| Horchata                            | 2.58             | -0.33        | 6.12         | -0.03            | -0.34        | 0.25         |
| Refresco                            | -1.45            | -4.80        | 1.84         | 0.34             | 0.02         | 0.63         |
| Tequila                             | -1.24            | -4.26        | 2.37         | 0.20             | -0.10        | 0.55         |
| <b><i>Narrow vs. Wide</i></b>       |                  |              |              |                  |              |              |
| Batido                              | -1.03            | -3.01        | 0.60         | 0.01             | -0.15        | 0.18         |
| Cerveza                             | -0.30            | -3.10        | 2.38         | 0.06             | -0.18        | 0.30         |
| Refresco                            | -0.51            | -3.37        | 2.11         | 0.02             | -0.19        | 0.26         |

385

### 386 Experiment 2: Heavy vs. Light Magic

387 Tequila and Refresco changed from preferring heavy objects in Experiment 1 to having no  
 388 preference in this experiment, while Batido continued to prefer the non-functional heavy objects  
 389 (see Table 1 for binomial test results and Table 2 for GLMM results). Margarita continued to prefer  
 390 heavy items and Cerveza went from having no preference to preferring the non-functional heavy

391 items, likely due to their interest in the magnet (Table 1). The magnet seemed to attract their  
392 interest, thus continuing or increasing their preference for heavy objects (Supplementary Material  
393 Video 2 available at: <https://youtu.be/TrKWEch1Y5M>). Tequila gave up after 17 trials, refusing to  
394 drop either type of object into the tube, indicating he may have inhibited his choice of heavy.  
395 Tequila and Refresco's performance improved with trial number, indicating that they learned  
396 through trial and error about which object was functional (Table 2). The other grackles  
397 performances decreased with increasing trial number, indicating that they did not learn about which  
398 object was functional (Table 2). Even though Tequila and Refresco did not learn to prefer light in  
399 the amount of trials given, they did exhibit flexibility in that they changed their preferences from  
400 heavy in the previous experiment to having no preference in this experiment. Indeed, Refresco  
401 would likely have shown a preference for light objects if given more trials since all choices in his  
402 last five trials were light objects (Supplementary Material Figure S1.2).

403

### 404 **Experiment 3: Narrow vs. Wide Equal Water Levels**

405 All three grackles that participated in this experiment displayed no preference for dropping objects  
406 into the functional narrow tube or the non-functional wide tube (see Table 1 for binomial test results  
407 and Table 2 for GLMM results, Supplementary Material Video 3 available at:  
408 <https://youtu.be/25Dj3vnSz5M>). None of the grackles' performances improved with trial number,  
409 indicating that they did not learn to distinguish which one was functional (Table 2). Batido appeared  
410 to rely on the strategy of dropping all objects into both tubes regardless of which tube he received a  
411 reward from, although in trial 12, he picked up the objects from the wide tube area and dropped  
412 them into the narrow tube even though he was only trained to push stones, not drop them  
413 (Supplementary Material Figure S1.3). Since no grackle passed this experiment, they were not  
414 given experiment 4 (Narrow vs. Wide with unequal water levels), which would have investigated  
415 their behavioral flexibility in this context.

416 Some grackles did not initially transfer from dropping previous object types to dropping the  
417 clay objects used in this experiment. It appeared as though they were trying to solve the problem,  
418 but did not perceive the clay objects as being the kind of thing one would drop into a water tube. In  
419 these cases, additional training was implemented using a single standard water tube and a mixture  
420 of clay objects and stones until the bird was willing to drop objects into the tube even if they only  
421 consisted of clay objects. Cerveza transferred to dropping clay objects after 4 training trials, but  
422 Tequila and Margarita were excluded from this experiment because they did not transfer to  
423 dropping clay objects into tubes. After 14 training trials on a regular water tube with stones and clay  
424 objects available to Tequila, it was clear that it would take many more training trials than there was  
425 time for and his motivation was greatly diminished. Margarita refused to participate in the training  
426 trials. Horchata was also excluded from this experiment because she refused to interact with the  
427 objects.

428

#### 429 **First Choices on First Trials**

430 All six grackles chose the more functional heavy objects as their first choice in their first trial in  
431 Heavy vs. Light, which indicates that they preferred the heavy objects from the very beginning of  
432 the experiment (Figure S1.1). Five out of six grackles chose the non-functional heavy objects in  
433 Heavy vs. Light Magic (Figure S1.2), which is not surprising given that they had learned to prefer  
434 heavy objects in the previous experiment and had likely never interacted with a magnet before,  
435 therefore they should have had no reason to have a prior understanding of how the Magic  
436 experiment worked. Two out of three grackles chose the functional narrow tube in Narrow vs. Wide  
437 with equal water levels, indicating no initial preference for a particular tube (Figure S1.3).

438

#### 439 **Did choice number influence the results?**

440 Individuals could learn how the task worked with each choice they made, potentially making each  
441 choice dependent on previous choices. Multiple choices could be made per trial; therefore I

442 analyzed how independent choice number was. Choice number was modeled as a random factor in  
443 the GLMM and did not influence the results, indicating that choices appear independent of each  
444 other (Table 2).

445

## 446 **DISCUSSION**

447 Despite their average brain size and lack of innovations, great-tailed grackles performed similarly to  
448 innovative and large-brained New Caledonian crows (Logan et al. 2014) on the Heavy vs. Light  
449 experiment, and grackles exhibited behavioral flexibility by changing their preferences in the Heavy  
450 vs. Light Magic experiment. Grackles and crows exhibited behavioral flexibility in different two-  
451 step experiments making it difficult to directly compare how similar their behavioral flexibility is:  
452 crows were not given Heavy vs. Light Magic because it was not invented yet and grackles were not  
453 able to be given Narrow vs. Wide with unequal water level experiment because no grackle passed  
454 the equal water level precursor. However, the fact that both species exhibited behavioral flexibility  
455 using the water tube paradigm allows for a more general comparison of behavioral flexibility as it  
456 relates to a species innovation frequency and brain size.

457 Both grackles and crows preferred to drop the functional heavy objects into the water tube  
458 rather than the less functional (for grackles) or non-functional (for crows) light objects. All grackles  
459 were successful at obtaining the food, and 4 out of 6 grackles preferred to drop the more functional  
460 heavy objects. Similar to the crows (Logan et al. 2014), Tequila, Batido, and Refresco preferred  
461 heavy objects significantly more than light objects and did not show a learning effect across the 20  
462 trials in this experiment, indicating that they relied on prior information about the world to solve  
463 this task.

464 Behavioral flexibility was exhibited by grackles insofar as they changed their preferences  
465 when the task changed. When the heavy objects in the Heavy vs. Light Magic experiment were no  
466 longer functional because they stuck to a magnet, some grackles changed from having preferred  
467 heavy objects when they were functional in the previous experiment to having no object preference



468 in the Magic experiment. This demonstrates attention to the functional properties of objects in  
469 changing circumstances. No grackle completely switched their preference to the light objects, which  
470 may have been made difficult by the design of the apparatus: if one heavy item was dropped into  
471 the tube, it stuck to the magnet and blocked access to the food regardless of how many light objects  
472 were dropped. Thus, grackles had to inhibit dropping any heavy objects to solve this problem,  
473 which made the task difficult. Despite the challenging apparatus, Refresco and Tequila likely would  
474 have further changed their preference to light objects if given more trials since their performance  
475 improved with the number of trials given, indicating that they were learning about the functional  
476 properties of the task.

477         Contrary to the only previous study comparing species with different brain sizes, which  
478 found a link between innovation frequency and brain size (Tebbich et al. 2010), I found no evidence  
479 to validate the link between innovation and behavioral flexibility or the link between behavioral  
480 flexibility and relative brain size when comparing non-innovative, average-brained great-tailed  
481 grackles with innovative, large-brained New Caledonian crows. Both species exhibited behavioral  
482 flexibility despite their differences in innovation frequency and relative brain size (Logan et al.  
483 2014). My results are consistent with findings from the two studies on large-brained species that  
484 directly investigated the relationship between innovation frequency and behavioral flexibility, and  
485 behavioral flexibility and relative brain size (Auersperg et al. 2011; Manrique et al. 2013). I  
486 conclude that behavioral flexibility must be quantified directly in each species rather than using  
487 innovation as an indirect proxy since it is unclear what innovation frequency actually measures.  
488 Future research using proxies for behavioral flexibility at a broad taxonomic scale should choose a  
489 proxy other than innovation frequency and validate it across a number of species before relying on  
490 it. As the field stands now, it is unclear what the cross-species correlations between innovation  
491 frequency and other factors imply.

492

493 **ACKNOWLEDGEMENTS**

494 I am grateful to Luisa Bergeron, Christin Palmstrom, Linnea Palmstrom, and Michelle Gertsvolf for  
495 trapping and aviary assistance; Alexis Breen for helping to train Jugo; Steve Rothstein for scouting  
496 grackles and for use of the aviaries; Joe Jablonski and David Bothman for making the apparatuses;  
497 Jill Zachary and Kathy Frye at Santa Barbara City Parks and Recreation for use of the Andree Clark  
498 Bird Refuge; Estelle Sandhaus and Chris Briggs at the Santa Barbara Zoo for access to wild  
499 grackles; Karrie Black for managing purchasing and grants; Alex Thornton for logistical advice;  
500 Dieter Lukas for conceptual input and analysis feedback; Krista Fahy at the Santa Barbara Museum  
501 of Natural History for helping with permit applications; Kristine Johnson, Sarah Overington, Julie  
502 Morand-Ferron, and Neeltje Boogert for grackle advice and trap plans; Manny Garcia for veterinary  
503 and permit support; Mary Hunsicker and Bertrand Lemasson for assistance with making the trap;  
504 Margaret Tarampi, Eric Egenolf, Rebecca Schaefer, and Sam Franklin for brainstorming object  
505 designs; Andrew Iwaniuk for access to the brain size database; Will Hoppitt for GLMM effect size  
506 interpretation assistance; Irina Mikhalevich and Ljerka Ostojić for manuscript feedback; and my  
507 funders: the SAGE Center for the Study of the Mind at the University of California Santa Barbara  
508 and the National Geographic Waitt Grants Program.

509

## 510 REFERENCES

- 511 Akaike H (1981) Likelihood of a model and information criteria. *J Econometrics* 16: 3-14.  
512 doi: 10.1016/0304-4076(81)90071-3
- 513 Alma S, Bee De Speroni N (1992) Indices cerebrales y composicion cuantitativa encefalica  
514 en *Athene cunicularia* y *Tyto alba*. *Facena* 9:19-37.
- 515 Auersperg AMI, von Bayern AMP, Gajdon GK, Huber L, Kacelnik A (2011) Flexibility in  
516 problem solving and tool use of kea and New Caledonian crows in a multi access box  
517 paradigm. *PLOS ONE* 6:e20231. doi: 10.1371/journal.pone.0020231

- 518 Bates D, Maechler M, Bolker B (2011) lme4: Linear mixed-effects models using S4 classes. R  
519 package version 0.999375-42. <http://CRAN.R-project.org/package=lme4>. Accessed 12  
520 January 2015
- 521 Bee de Speroni N, Carezzano F (1995) Volumetric analysis of the visual, trigeminal and acoustic  
522 nuclei in four avian species (Rheidae, Spheniscidae, Tinamidae). *Mar Ornithol* 23: 11-15.
- 523 Bird CD, Emery NJ (2009) Rooks use stones to raise the water level to reach a floating worm. *Curr*  
524 *Biol* 19:1410-1414. doi: 10.1016/j.cub.2009.07.033
- 525 Boire D, Baron G (1994) Allometric comparison of brain and main brain subdivisions in birds.  
526 *Journal of Brain Research* 35:49-66
- 527 Buckner C (2013) A property cluster theory of cognition. *Philosophical Psychology* 28:307-336.  
528 doi: 10.1080/09515089.2013.843274
- 529 Burnham KP, Anderson DR (2002) Model selection and multimodel inference: a practical  
530 information-theoretic approach, 2nd edn. Springer, New York.
- 531 Carezzano FJ, Bee De Speroni N (1995) Composicion volumetrica encefalica e indices cerebrales  
532 en tres aves de ambiente acuatico (Ardeidae, Podicipedidae, Rallidae). *Facena* 11:75-83.
- 533 Cheke LG, Bird CD, Clayton NS (2011) Tool-use and instrumental learning in the Eurasian jay  
534 (*Garrulus glandarius*). *Anim Cogn* 14:441-455. doi: 10.1007/s10071-011-0379-4
- 535 Cheke LG, Loissel E, Clayton NS (2012) How do children solve Aesop's Fable? *PLOS ONE*  
536 7:e40574. doi: 10.1371/journal.pone.0040574
- 537 Crile G, Quiring DP (1940) A record of the body weight and certain organ and gland weights of  
538 3690 animals. *Ohio J Sci* 40:219-259.
- 539 Day LB, Westcott DA, Olster DH (2005) Evolution of bower complexity and cerebellum size in  
540 bowerbirds. *Brain Behav Evol* 66: 62-72.
- 541 Ducatez S, Clavel J, Lefebvre L (2015) Ecological generalism and behavioural innovation in birds:  
542 technical intelligence or the simple incorporation of new foods? *J Anim Ecol* 84:79-89. doi:  
543 10.1111/1365-2656.12255

- 544 Ebinger P (1995) Domestication and plasticity of brain organization in mallards (*Anas*  
545 *platyrhynchos*). *Brain Behav Evol* 45: 286-300. doi: 10.1159/000113557
- 546 Fernandez P, Carezzano F, Bee De Speroni N (1997) Analisis cuantitativo encefalico e indices  
547 cerebrales en *Aratinga acuticaudata* y *Myiopsitta monachus* de Argentina (Aves:  
548 Psittacidae). *Rev Chil Hist Nat* 70:269-275.
- 549 Frahm HD, Rehkamper G (1998) Allometric comparison of the brain and brain structures in the  
550 white crested Polish chicken with uncrested domestic chicken breeds. *Brain Behav Evol* 52:  
551 292-307. doi: 10.1159/000006574
- 552 Hadfield J (2010) MCMCglmm: Markov chain Monte Carlo methods for generalised linear mixed  
553 models.  
554 [http://citeseerx.ist.psu.edu/viewdoc/download;jsessionid=E395FF7367BF580D916E465F55](http://citeseerx.ist.psu.edu/viewdoc/download;jsessionid=E395FF7367BF580D916E465F55302C60?doi=10.1.1.160.5098&rep=rep1&type=pdf)  
555 [302C60?doi=10.1.1.160.5098&rep=rep1&type=pdf](http://citeseerx.ist.psu.edu/viewdoc/download;jsessionid=E395FF7367BF580D916E465F55302C60?doi=10.1.1.160.5098&rep=rep1&type=pdf) Accessed 7 May 2015
- 556 Hadfield J (2014) MCMCglmm course notes. [http://cran.r-](http://cran.r-project.org/web/packages/MCMCglmm/vignettes/CourseNotes.pdf)  
557 [project.org/web/packages/MCMCglmm/vignettes/CourseNotes.pdf](http://cran.r-project.org/web/packages/MCMCglmm/vignettes/CourseNotes.pdf). Accessed 7 May 2015
- 558 Hadfield JD, Nakagawa S (2010) General quantitative genetic methods for comparative biology:  
559 Phylogenies, taxonomies, meta-analysis and multi-trait models for continuous and  
560 categorical characters. *J Evol Biol* 23:494–508.
- 561 Healy SD, Rowe C (2007) A critique of comparative studies of brain size. *Proc R Soc B* 274:453-  
562 464. doi: 10.1098/rspb.2006.3748
- 563 Hunt GR (1996) Manufacture and use of hook-tools by New Caledonian crows. *Nature* 379:249-  
564 251. doi: 10.1038/379249a0
- 565 Hunt GR (2008) Introduced *Lantana camara* used as tools by New Caledonian crows (*Corvus*  
566 *moneduloides*). *N Z J Zool* 35:115-118.
- 567 Hunt GR, Gray RD (2004) Direct observations of pandanus-tool manufacture and use by a New  
568 Caledonian crow (*Corvus moneduloides*). *Anim Cogn* 7:114-120. doi: 10.1007/s10071-003-  
569 0200-0

- 570 Iwaniuk AN (2004) Brood parasitism and brain size in cuckoos: A cautionary tale on the use of  
571 modern comparative methods. *Int J Comp Psychol* 17: 17-33.
- 572 Iwaniuk AN, Dean KM, Nelson JE (2005) Interspecific allometry of the brain and brain regions in  
573 parrots (Psittaciformes): comparisons with other birds and primates. *Brain Behav Evol*  
574 65:40-59. doi: 10.1159/000081110
- 575 Iwaniuk AN, Hurd PL (2005) The evolution of cerebrotypes in birds. *Brain Behav Evol* 65:215-  
576 230. doi: 10.1159/000084313
- 577 Iwaniuk AN, Nelson JE (2001) A comparative analysis of relative brain size in waterfowl  
578 (Anseriformes). *Brain Behav Evol* 57:87-97. doi: 10.1159/000047228
- 579 Iwaniuk AN, Nelson JE (2003) Developmental differences are correlated with relative brain size in  
580 birds: a comparative analysis. *Can J Zool* 81: 1913-1928.
- 581 Iwaniuk AN, Nelson JE, James HF, Olson SL (2004) A comparative test of the correlated evolution  
582 of flightlessness and relative brain size in birds. *J Zool Lond* 263: 317-327. doi:  
583 10.1017/S0952836904005308
- 584 Iwaniuk AN, Wylie DRW (2006) The evolution of stereopsis and the Wulst in caprimulgid  
585 birds: a comparative analysis. *J Comp Physiol A* 192: 1313-1326. doi: 10.1007/s00359-006-  
586 0161-2
- 587 Jelbert SA, Taylor AH, Cheke LG, Clayton NS, Gray, RD (2014) Using the Aesop's fable paradigm  
588 to investigate causal understanding of water displacement by New Caledonian crows. *PLOS*  
589 *ONE* 9:e92895. doi: 10.1371/journal.pone.0092895
- 590 Layard EL, Layard ELC (1882) Notes on the avifauna of New Caledonia. *Ibis* 6:520-522.
- 591 Lefebvre L, Whittle P, Lascaris E, Finkelstein A (1997) Feeding innovations and forebrain size in  
592 birds. *Anim Behav* 53:549-560. doi: 10.1006/anbe.1996.0330
- 593 Lefebvre L, Reader SM, Sol D (2004) Brains, innovation and evolution in birds and primates. *Brain*  
594 *Behav Evol* 63:233-246. doi: 10.1159/000076784

- 595 Lefebvre L, Reader SM, Sol D (2013) Innovating innovation rate and its relationship with brains,  
596 ecology and general intelligence. *Brain Behav Evol* 81:143-145. doi: 10.1159/000348485
- 597 Le Goupils, M., 1928. Dans la Brousse Calédonienne: Souvenirs d'un Ancien Planteur, 1898-1904.  
598 Perrin, Paris.
- 599 Logan CJ, Jelbert SA, Breen AJ, Gray RD, Taylor AH (2014) Modifications to the Aesop's Fable  
600 paradigm change performances in New Caledonian crows. *PLOS ONE* 9:e103049.  
601 doi:10.1371/journal.pone.0103049
- 602 Logan C (2015) Great-tailed grackle water tube experiments, Santa Barbara, CA USA 2014-2015.  
603 KNB Data Repository. doi:
- 604 Manrique HM, Völter CJ, Call J (2013) Repeated innovation in great apes. *Anim Behav* 85:195-  
605 202. doi: 10.1016/j.anbehav.2012.10.026
- 606 Mlikovsky J (1989a) Brain Size in Birds: 1. Tinamiformes Through Ciconiformes, *Vestrik*  
607 *Ceskoslovenska Spolecnosti Zoologicka* 53:33-47.
- 608 Mlikovsky J (1989b) Brain Size in Birds: 2. Falconiformes through Gaviiformes. *Vestrik*  
609 *Ceskoslovenska Spolecnosti Zoologicka* 53:200-213.
- 610 Mlikovsky J (1989c) Brain Size in Birds: 3. Columbiformes Through Piciformes. *Vestrik*  
611 *Ceskoslovenska Spolecnosti Zoologicka* 53 252-273.
- 612 Mlikovsky J (1990) Brain Size in Birds: 4. Passeriformes. *Acta Soc Zool Bohemoslov* 54:27-101.
- 613 Møller AP, Erritzoe J, Garamszegi LZ (2004) Covariation between brain size and immunity in  
614 birds: implications for brain size evolution. *J Evol Biol* 18:223-237. doi: 10.1111/j.1420-  
615 9101.2004.00805.x
- 616 Nicolakakis N, Lefebvre L (2000) Forebrain size and innovation rate in European birds: feeding,  
617 nesting and confounding variables. *Behav* 137:1415-1429. doi: 10.1163/156853900502646
- 618 Overington SE, Morand-Ferron J, Boogert NJ, Lefebvre L (2009) Technical innovations drive the  
619 relationship between innovativeness and residual brain size in birds. *Anim Behav* 78:1001-  
620 1010. doi: 10.1016/j.anbehav.2009.06.033

- 621 Overington SE, Cauchard L, Cote KA, Lefebvre L (2011) Innovative foraging behavior in birds:  
622 What characterizes an innovator? Behav Process 87:274-285. doi:  
623 10.1016/j.beproc.2011.06.002
- 624 Pistone E, Carezzano F, Bee De Speroni N (2002) Tamano relativo encefalico e indices cerebrales  
625 en *Vanellus c. chilensis* (Aves: Charadriidae). Rev Chil Hist Nat 75: 595-602. doi:  
626 10.4067/S0716-078X2002000300010
- 627 Pyle P (2001) Identification guide to North American birds part 1. Sheridan Books, Inc., Ann  
628 Arbor, Michigan.
- 629 R Core Team (2014) R: A language and environment for statistical computing. R Foundation for  
630 Statistical Computing, Vienna, Austria. <http://www.R-project.org>. Accessed 3 Jan 2015.
- 631 Reader SM, Laland KN (2002) Social intelligence, innovation, and enhanced brain size in primates.  
632 Proceedings of the National Academy of Sciences 99:4436-4441. doi:  
633 10.1073/pnas.062041299
- 634 Rehkämper G, Frahm HD, Cnotka J (2008) Mosaic evolution and adaptive brain component  
635 alteration under domestication seen on the background of evolutionary theory. Brain Behav  
636 Evol 71: 115-126. doi: 10.1159/000111458
- 637 Rehkämper G, Frahm HD, Zilles K (1991) Quantitative development of brain and brain structures  
638 in birds (Galliformes and Passeriformes) compared to that in mammals (Insectivores and  
639 Primates). Brain Behav Evol 37:125-143. doi: 10.1159/000316088
- 640 Rehkämper G, Kart E, Frahm HD, Werner CW (2003) Discontinuous variability of brain  
641 composition among domestic chicken breeds. Brain Behav Evol 61: 59-69.
- 642 Taylor AH, Elliffe DM, Hunt GR, Emery NJ, Clayton NS, Gray RD (2011) New Caledonian crows  
643 learn the functional properties of novel tool types. PLOS ONE 6:e26887.  
644 doi:10.1371/journal.pone.0026887
- 645 Tebbich S, Sterelny K, Teschke I (2010) The tale of the finch: adaptive radiation and behavioural  
646 flexibility. Philos Trans R Soc B 365:1099-1109. doi: 10.1098/rstb.2009.0291



647 Timmermans S, Lefebvre L, Boire D, Basu P (2000) Relative size of the hyperstriatum ventrale is  
648 the best predictor of feeding innovation rate in birds. *Brain Behav Evol* 56:196-203. doi:  
649 10.1159/000047204
